# Supplementary material for: Serial Llama Immunization with Various SARS-CoV-2 RBD Variants Induces Broad Spectrum Virus-Neutralizing Nanobodies
Source: MDPI journal article supplement (doi:10.3390/vaccines12020129), 2024-01-26
Supplement: s1 [file s1]

## A Cytometry

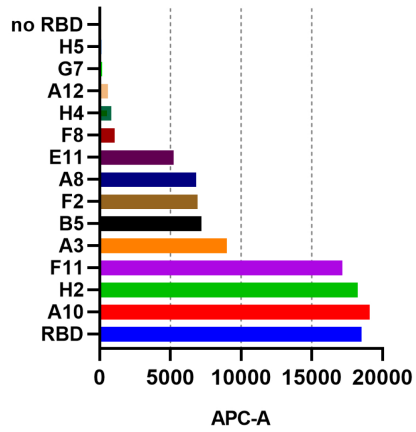

## B ELISA

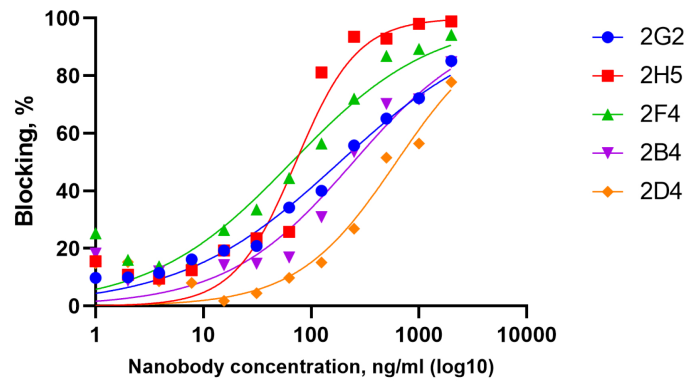

**Figure S1.** (A) Analysis of RBD/ACE2-blocking activity of the nanobodies identified in this study using HEK293T-hACE2 cells. (B) Competition ELISA for nanobodies 2F4, 2D4, 2B4, 2H5, and 2G2.
